# Supplementary material for: Boosting hydrogen production from alkaline water splitting via electrochemical active surface reconstruction of transition metal sulfide electrocatalysts
Source: Royal Society of Chemistry journal article supplement (doi:10.1039/d4ta07747d), 2025-01-01
Supplement: d4ta07747d1.pdf [file d4ta07747d1.pdf]

## Supporting Information

### Boosting hydrogen production from alkaline water splitting via electrochemical reconstructing active surface of transition metal sulfide electrocatalysts

Chenhao Shi<sup>a,b</sup>, Jing Zhou<sup>c</sup>, Muzaffar Ahmad Boda<sup>a</sup>, Kunfeng Zhao<sup>a</sup>, Zhiquan Yang<sup>a</sup>, Dingwang Yuan<sup>c,\*</sup>, Zhiguo Yi<sup>a,b,\*</sup>

<sup>a</sup>State Key Lab of High Performance Ceramics and Superfine Microstructure, Shanghai Institute of Ceramics, Chinese Academy of Sciences, Shanghai 201899, China

<sup>b</sup>Center of Materials Science and Optoelectronics Engineering, University of Chinese Academy of Sciences, Beijing 100049, China

<sup>c</sup>College of Materials Science and Engineering, Hunan University, ChangSha 410082, China

E-mail address: [zhiguo@mail.sic.ac.cn](mailto:zhiguo@mail.sic.ac.cn) (Zhiguo Yi)

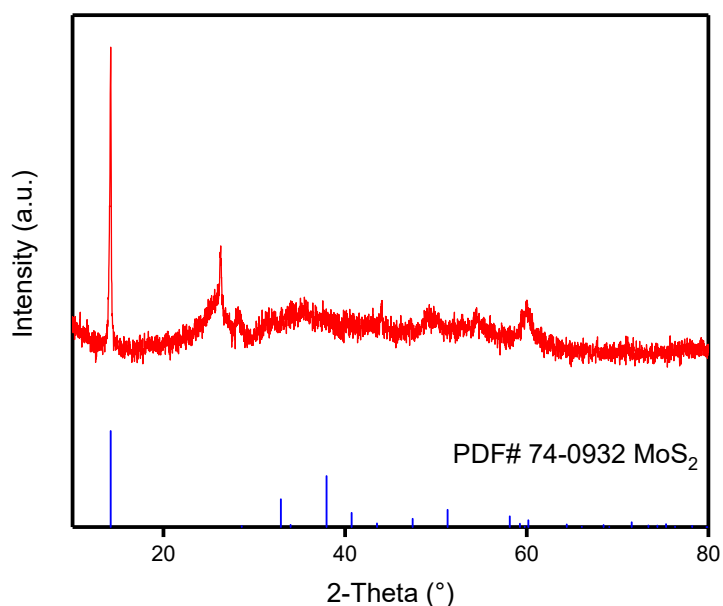

Fig. S1 XRD pattern of the NMS (increased MoS<sub>2</sub> mass by 2 times)

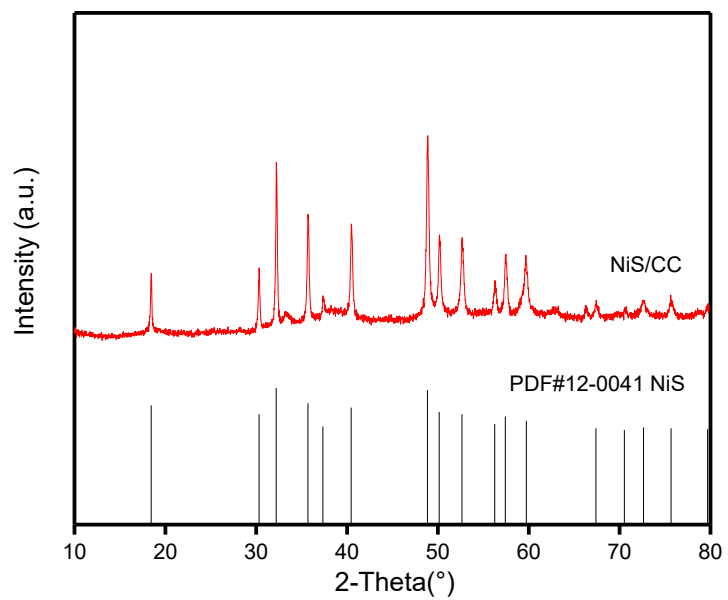

Fig. S2 XRD pattern of the NiS/CC

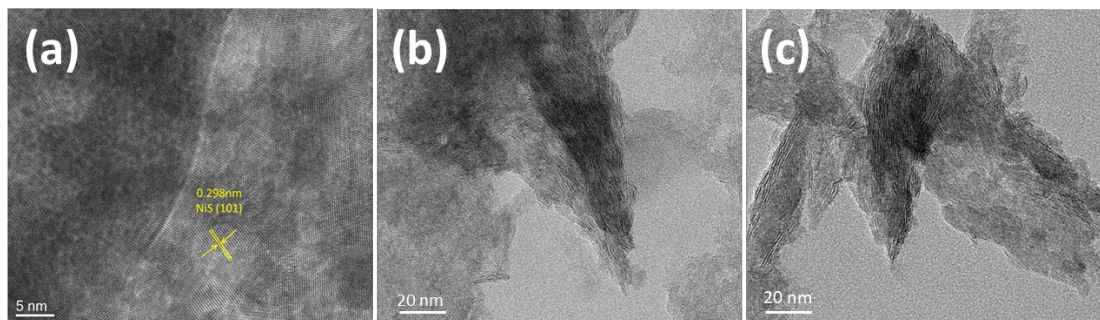

Fig. S3 TEM images of NMS (a) and 40s-NMSO (b-c)

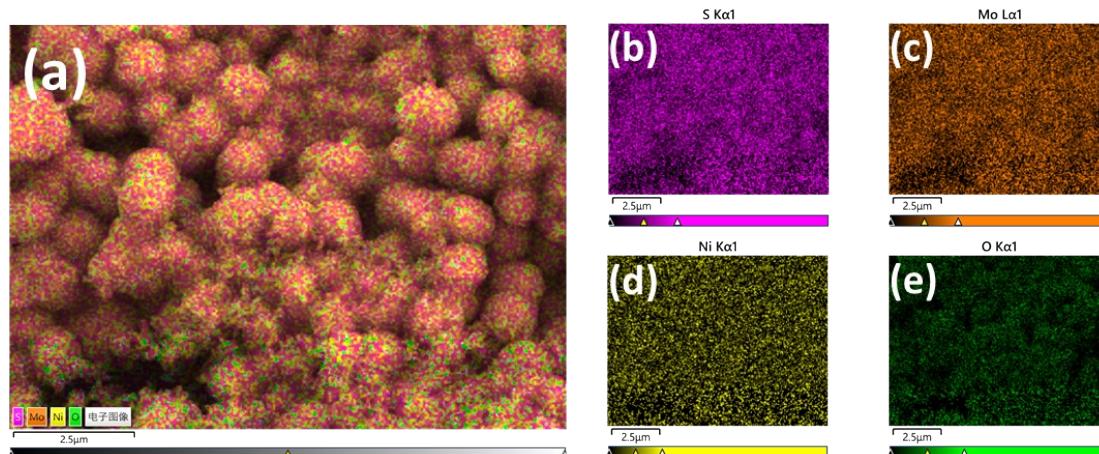

Fig. S4 SEM image of NMS (a) and its corresponding elemental mapping images for S (b), Mo (c), Ni (d) and O (e), respectively.

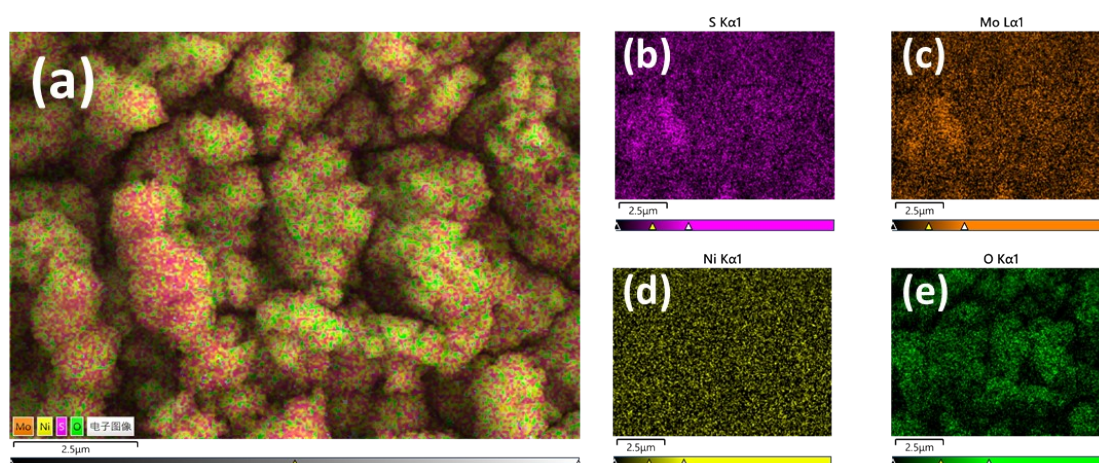

Fig. S5 SEM image of 40s-NMSO (a) and its corresponding elemental mapping images for S (b), Mo (c), Ni (d) and O (e), respectively.

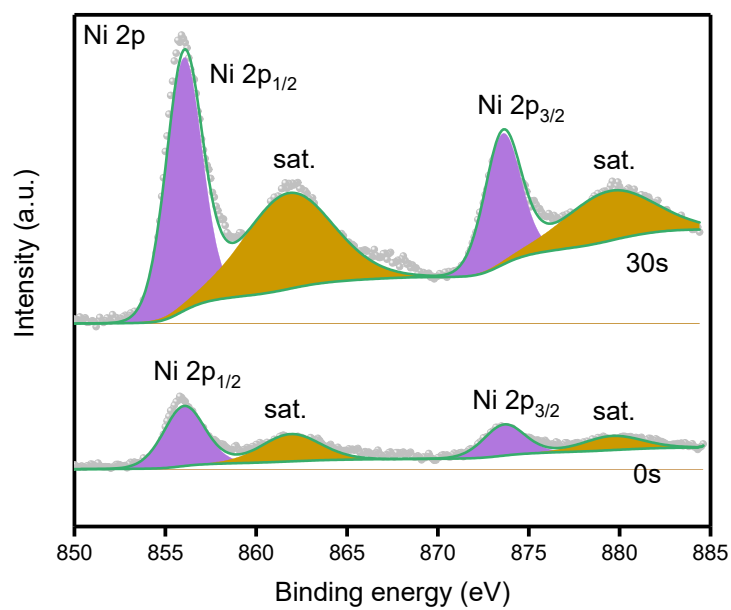

Fig. S6 XPS spectra of Ni2p for the 30s-NMSO (upper) and NMS (bottom) samples

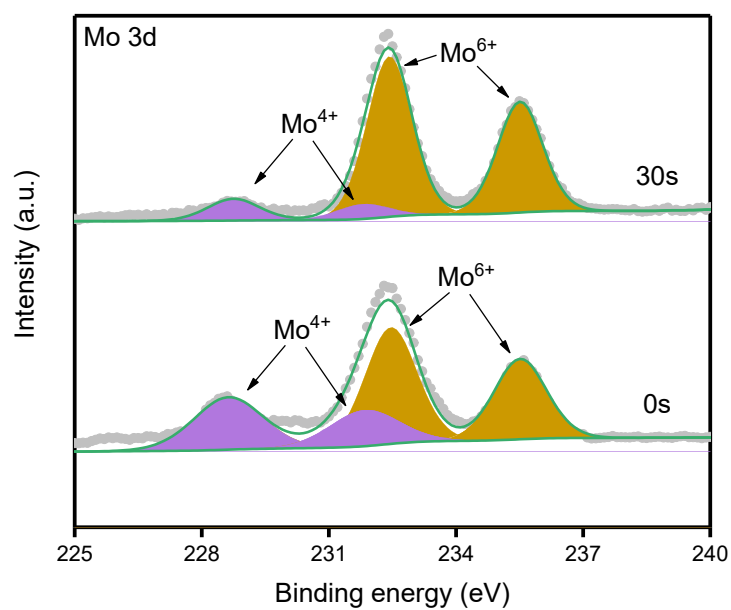

Fig. S7 XPS spectra of Mo3d for the 30s-NMSO (upper) and NMS (bottom) samples

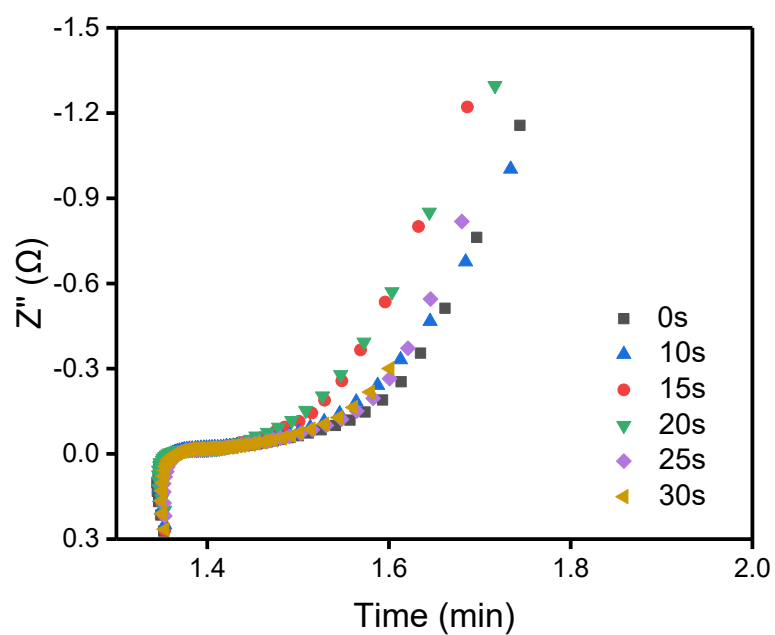

Fig. S8 Electrochemical impedance spectroscopy (EIS) of NMSO series catalysts in the frequency range from 100 kHz to 10 mHz

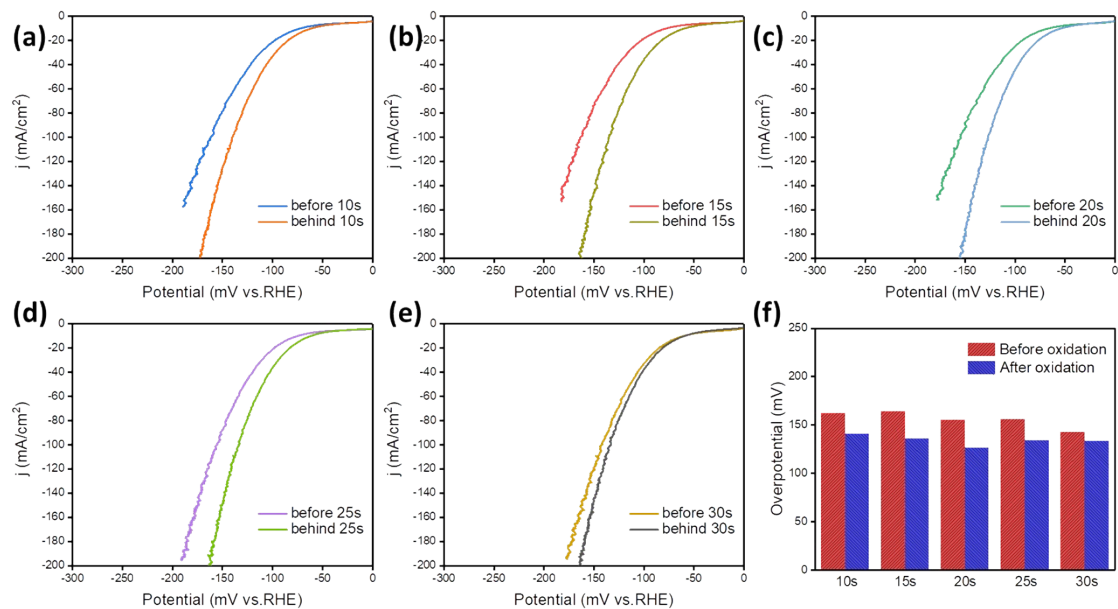

Fig. S9 (a-e) The LSV test diagram of each component catalyst before and after anodic oxidation. (f) The overpotential( $\eta_{100}$ ) comparison diagram of each component catalyst before and after anodic oxidation treatment

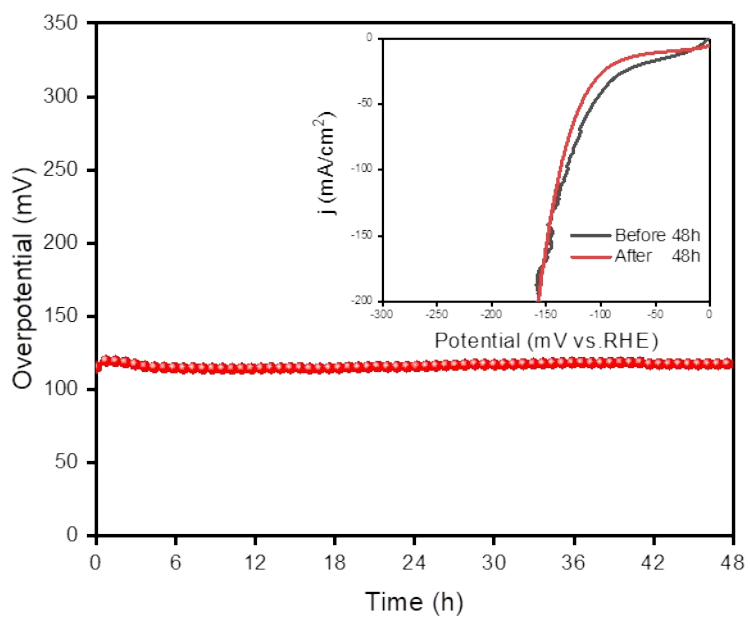

Fig. S10 Potential test figure of 20s-NMSO at constant current density of 100mA/cm<sup>2</sup>. Inset shows ???

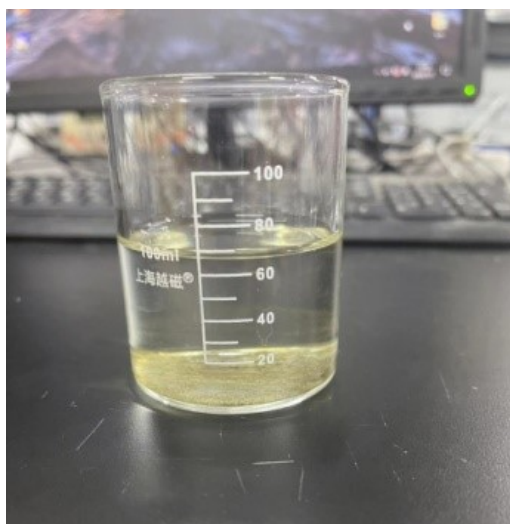

Fig. S11 KOH solution after the anodic oxidation treatment

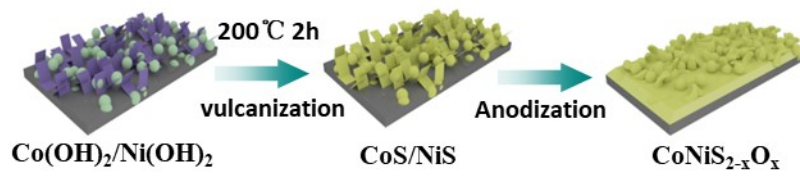

Fig. S12 Preparation procedure of NCSO

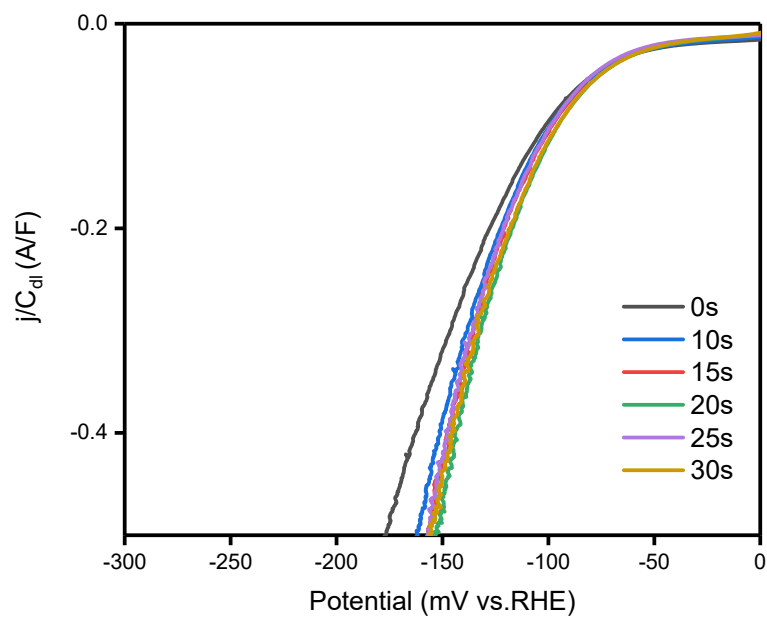

Fig. S13 LSV curves of NMSO series materials normalized by double layer capacitance

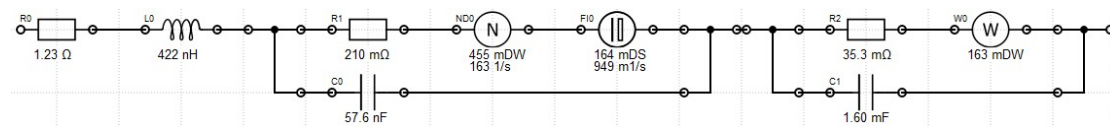

Fig. S14 Schematic diagram of circuit simulation for each component material.

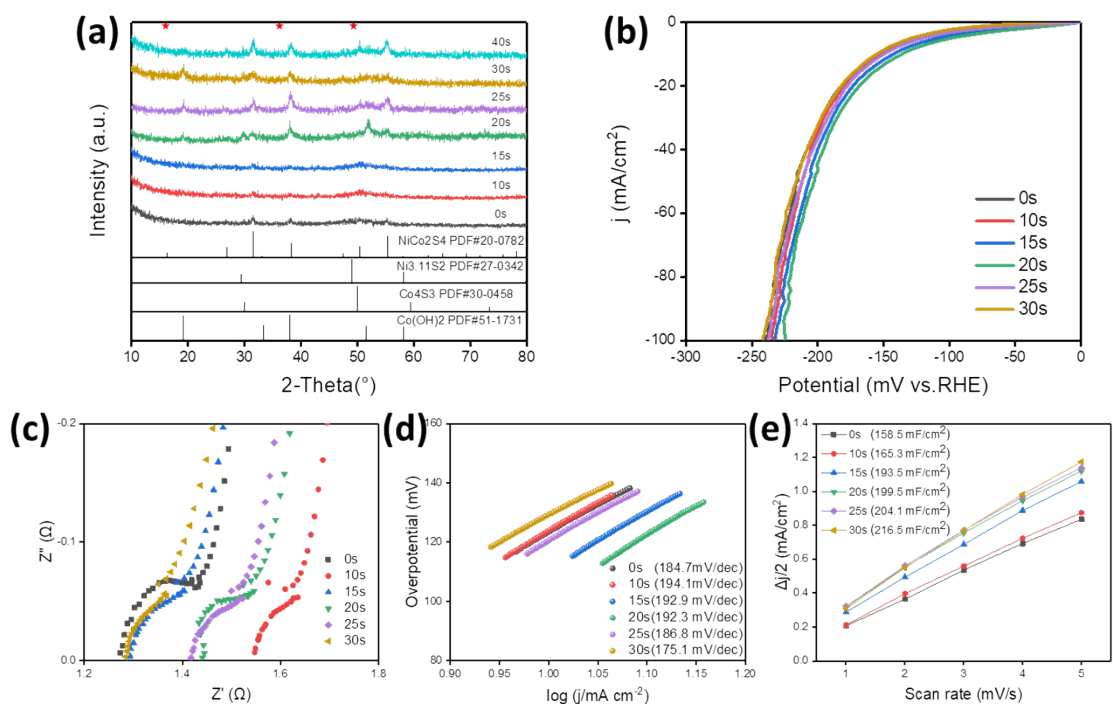

Fig. S15 (a) XRD patterns of NCSO after anodic treatment for different time.(b) HER polarization LSV curves of NCSO series at a scanning rate of 2 mV/s. (c) Electrochemical impedance spectroscopy (EIS) of NCSO series catalysts in the frequency range from 100 kHz to 10 mHz. (d) Tafel plots of NCSO series catalysts. (e) CV curves of NCSO series catalysts at the same abscissa at the scanning rates of 1,2,3,4 and 5 mV/s, the maximum difference in ordinates.



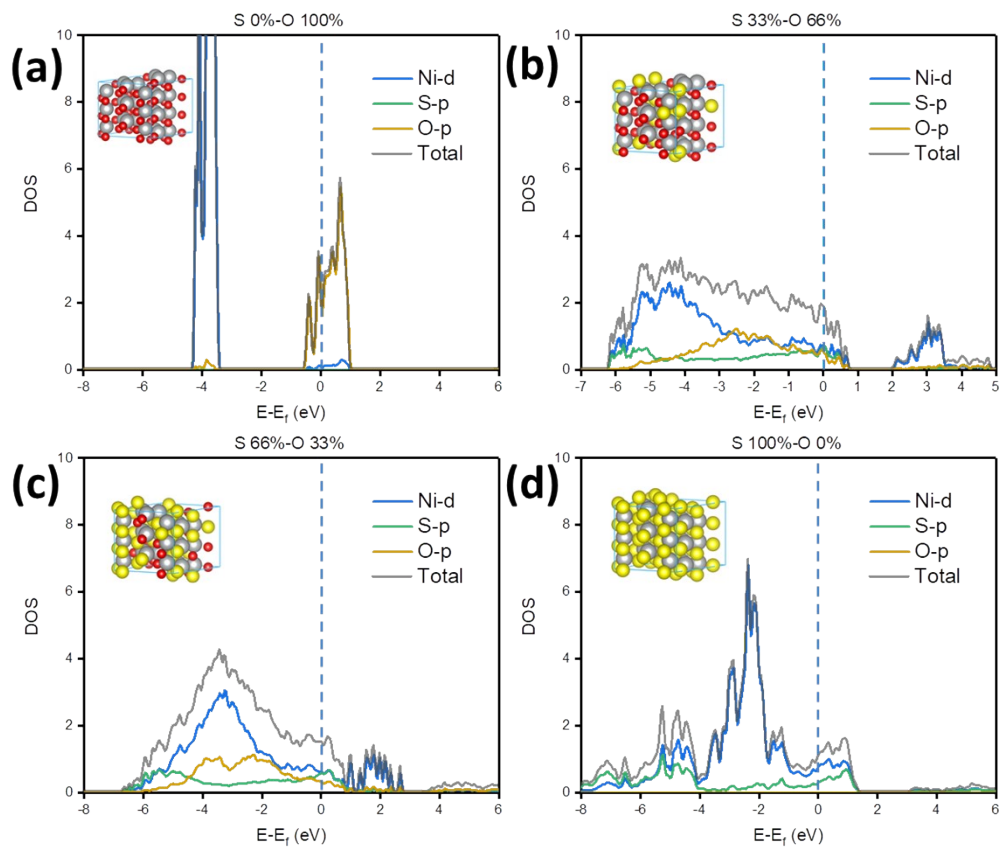

Fig. S16 The PDOS diagram of NiS with different contents of O doping: (a) O 100%; (b) O 66%; (c) O 33%; (d) O 0%.

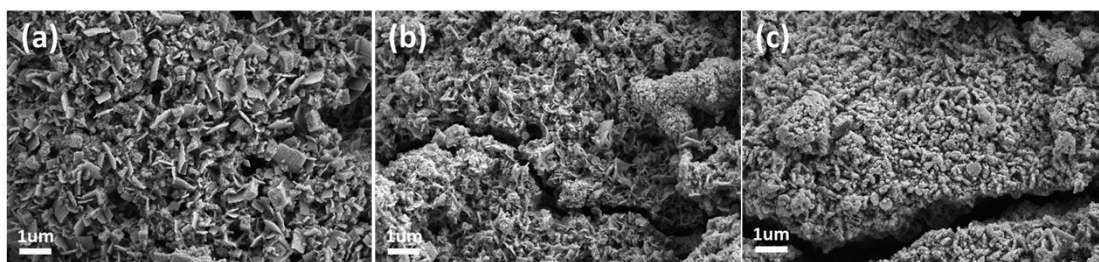

Fig. S17 SEM images of : (a) NCS; (b) 20s-NCSO; (c) 30s-NCSO.

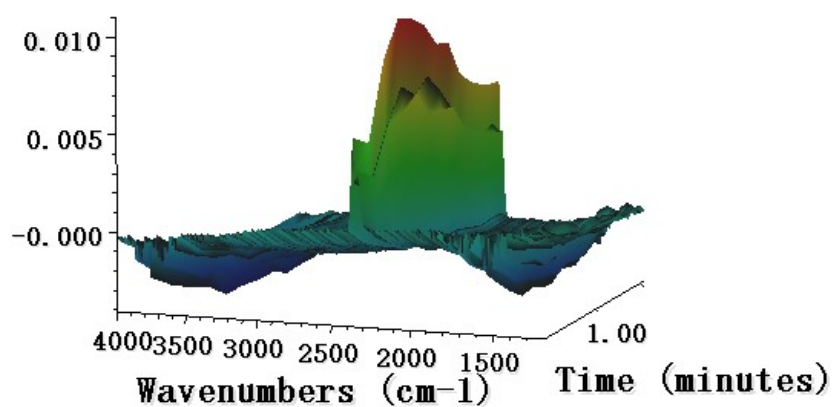

Fig. S18 Three-dimensional in situ infrared absorption spectra of the initial time after anodic potential access

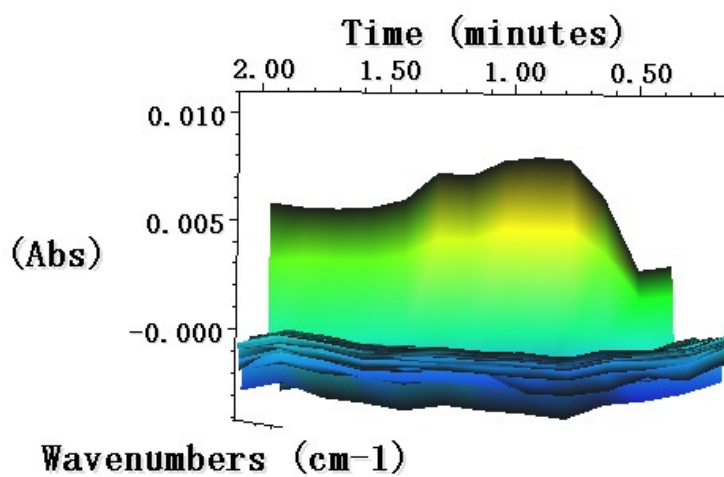

Fig. S19 Three-dimensional in situ infrared absorption spectra of the initial time after anodic potential access

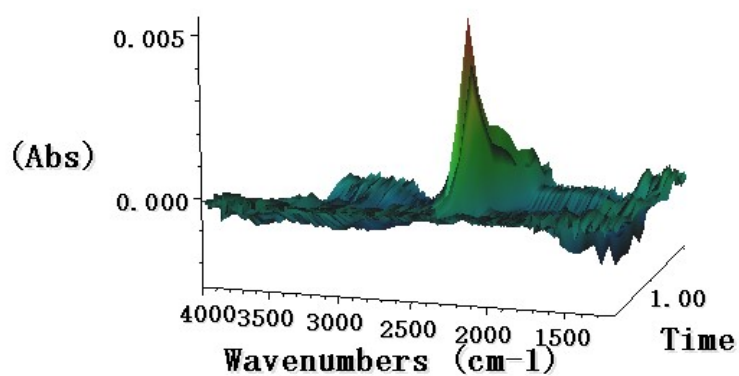

Fig. S20 Three-dimensional in situ infrared absorption spectra at the second time after anodic potential access

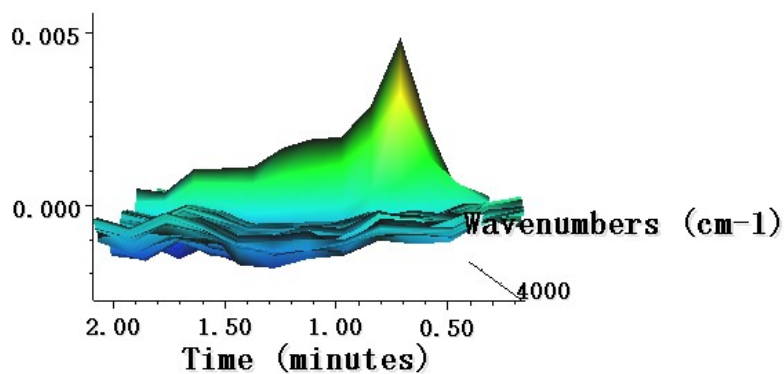

Fig. S21 Three-dimensional in situ infrared absorption spectra at the second time after anodic potential access

Tab. S1 The BET specific surface area of each component

| Sample ID.                           | NMS    | 15s-NMSO | 30s-NMSO |
|--------------------------------------|--------|----------|----------|
| BET surface area (m <sup>2</sup> /g) | 11.430 | 30.201   | 52.059   |

Tab. S2 EDS quantitative test results of NMS

| Element | Wt%   | Wt% Sigma | Atomic percentage |
|---------|-------|-----------|-------------------|
| O       | 24.08 | 0.31      | 50.58             |
| S       | 18.50 | 0.29      | 19.38             |
| Ni      | 44.73 | 0.47      | 25.60             |
| Mo      | 12.69 | 0.67      | 4.44              |

Tab. S3 EDS quantitative test results of 15s-NMS

| Element | Wt%   | Wt% Sigma | Atomic percentage |
|---------|-------|-----------|-------------------|
| O       | 23.70 | 0.29      | 49.68             |
| S       | 18.22 | 0.27      | 19.06             |
| Ni      | 49.44 | 0.47      | 28.24             |
| Mo      | 8.64  | 0.65      | 3.02              |

Tab. S4 EDS quantitative test results of 30s-NMS

| Element | Wt%   | Wt% Sigma | Atomic percentage |
|---------|-------|-----------|-------------------|
| O       | 28.13 | 0.31      | 55.36             |
| S       | 15.28 | 0.25      | 15.00             |
| Ni      | 53.16 | 0.48      | 28.51             |
| Mo      | 3.43  | 0.64      | 1.13              |

Tab. S5 The quantitative results of each element of NMS calculated by XPS

| Element | S    | S2-   | S6+   | Mo4+ | Mo6+  | Ni2+  |
|---------|------|-------|-------|------|-------|-------|
| At%     | 9.52 | 18.89 | 34.81 | 7.79 | 13.16 | 15.83 |

Tab. S6 The quantitative results of each element of 30s-NMSO calculated by XPS

| Element | S    | S2-  | S6+  | Mo4+ | Mo6+  | Ni2+  | O2-   |
|---------|------|------|------|------|-------|-------|-------|
| At%     | 3.49 | 5.93 | 6.42 | 1.77 | 11.46 | 50.16 | 20.76 |

Tab. S7  $R_{ct}$  obtained after fitting the EIS results of each component

| Element           | 0s  | 10s | 15s | 20s | 25s | 30s |
|-------------------|-----|-----|-----|-----|-----|-----|
| $R_{ct}(m\Omega)$ | 217 | 202 | 197 | 178 | 190 | 210 |
